# Supplementary material for: pH-induced conformational changes in histamine in the solid state
Source: Royal Society of Chemistry journal article supplement (doi:10.1039/c9ra03418h), 2019-01-01
Supplement: c9ra03418h1.pdf [file c9ra03418h1.pdf]

Supplementary Information for the article

**pH-Induced Conformational Changes of Histamine in the Solid State**

Kanchanok Kodchakorn,<sup>a,b</sup> Piyarat Nimmanpipug,<sup>a,\*</sup> Suttinun Phongtamrug,<sup>c</sup>

and Kohji Tashiro<sup>d,\*\*</sup>

<sup>a</sup> Department of Chemistry, Faculty of Science and Center of Excellence for Innovation in Analytical Science and Technology, Chiang Mai University, Chiang Mai 50200, Thailand

<sup>b</sup> Doctor of Philosophy Program in Chemistry, Faculty of Science, Chiang Mai University, Chiang Mai 50200, Thailand

<sup>c</sup> Department of Industrial Chemistry, Faculty of Applied Science, King Mongkut's University of Technology North Bangkok, Bangkok 10800, Thailand

<sup>d</sup> Department of Future Industry-Oriented Basic Science and Materials, Graduate School of Engineering, Toyota Technological Institute, Tempaku, Nagoya 468-8511, Japan

\* Corresponding author at: Computational Simulation and Modeling Laboratory (CSML), Department of Chemistry, Faculty of Science, Chiang Mai University, Chiang Mai 50200, Thailand. Tel.: +66 53 943341, E-mail addresses: piyarat.n@cmu.ac.th (P. Nimmanpipug)

\*\* Corresponding author at: Graduate School of Engineering, Toyota Technological Institute, Tempaku, Nagoya 468-8511, Japan. Tel.: +81 0 52 809 1790; fax: +81 0 52 809 1793, E-mail addresses: ktashiro@toyota-ti.ac.jp (K. Tashiro)

Table S1. Comparison between the observed and calculated vibrational frequencies (in  $\text{cm}^{-1}$ ) for the various histamine forms.

| Free base (H1) |            |                                                          | Monocation (H2) |            |                             | Dication (H3) |            |                             |
|----------------|------------|----------------------------------------------------------|-----------------|------------|-----------------------------|---------------|------------|-----------------------------|
| Observed       | Calculated | Assignments                                              | Observed        | Calculated | Assignments                 | Observed      | Calculated | Assignments                 |
| 3298           | 3301       | Am $\nu(\text{NH})$                                      | 3107            | 3091       | Am $\nu(\text{NH}_3^+)$     |               | 3188       | Am $\nu(\text{NH}_3^+)$     |
| 3251           | 3176       | Am $\nu(\text{NH})$                                      |                 |            |                             |               | 3145       | Im $\nu(\text{CH})$         |
| 3165           | 3160       | Im $\nu(\text{CH})$                                      | 2987            | 2978       | $\nu(\text{CH}_2)$          |               | 3109       | Im $\nu(\text{CH})$         |
| 3105           | 3151       | Im $\nu(\text{CH})$                                      | 2948            | 2939       | Am $\nu(\text{NH}_3^+)$     | 3084          | 3064       | Am $\nu(\text{NH}_3^+)$     |
| 2967           | 2996       | $\nu(\text{CH}_2)$                                       | 2896            |            | $\nu(\text{CH}_2)$          | 3014          | 3022       | Im $\nu(\text{NH})$         |
| 2955           | 2953       | $\nu(\text{CH}_2)$                                       | 2669            | 2663       | Am $\nu(\text{NH}_3^+)$     | 2949          | 2954       | Im $\nu(\text{NH})$         |
| 2581           | 2567       | Im $\nu(\text{NH})$                                      | 1626            | 1631       | Am $\delta(\text{NH}_3^+)$  | 1597          | 1611       | Im $\nu(\text{C}=\text{C})$ |
| 1614           | 1615       | Am $\delta(\text{NH})$                                   | 1567            | 1550       | Im $\nu(\text{C}=\text{C})$ | 1526          | 1530       | Am $\delta(\text{NH}_3^+)$  |
| 1592           | 1587       | Im $\nu(\text{C}=\text{C})/\text{Im } \delta(\text{NH})$ | 1477            | 1465       | Im $\delta(\text{ring})$    |               |            |                             |
| 1468           | 1468       | Im $\nu(\text{C}=\text{C})/\text{Im } \delta(\text{NH})$ | 1441            | 1445       | Im $\delta(\text{ring})$    | 1474          | 1496       | Im $\nu(\text{ring})$       |
| 1453           | 1452       | Im $\delta(\text{ring})$                                 | 1388            | 1372       | $\omega(\text{CH}_2)$       | 1454          | 1459       | Im $\delta(\text{ring})$    |
| 1429           | 1423       | $\delta(\text{CH}_2)$                                    | 1319            | 1332       | $t(\text{CH}_2)$            | 1437          | 1444       | $\delta(\text{CH}_2)$       |
| 1355           | 1335       | $\omega(\text{CH}_2)$                                    | 1247            | 1240       | $\omega(\text{CH}_2)$       | 1347          | 1337       | $\omega(\text{CH}_2)$       |
| 1291           | 1275       | $\omega(\text{CH}_2)$                                    |                 |            |                             | 1237          | 1244       | $\omega(\text{CH}_2)$       |
| 1177           | 1177       | Im $\delta(\text{CH})$                                   |                 |            |                             | 1178          | 1172       | Im $\delta(\text{ring})$    |
| 1124           | 1123       | Am $t(\text{NH})$                                        | 1155            | 1158       | Am $r(\text{NH}_3^+)$       | 1149          | 1143       | Am $r(\text{NH}_3^+)$       |
| 1092           | 1090       | Im $\delta(\text{CH})$                                   | 1094            | 1086       | Im $\delta(\text{CH})$      | 1090          | 1099       | Im $\delta(\text{CH})$      |
| 1031           | 1015       | $\nu(\text{skel})$                                       | 1026            | 1014       | $\nu(\text{skel})$          | 1030          | 1020       | $\nu(\text{skel})$          |
| 923            | 906        | Im $\delta(\text{ring})$                                 | 989             | 980        | Im $\delta(\text{ring})$    | 957           | 949        | $\nu(\text{skel})$          |
| 830            | 798        | Im $\gamma(\text{CH})$                                   | 848             | 845        | Im $\gamma(\text{ring})$    | 852           | 866        | Im $\gamma(\text{ring})$    |
| 811            | 793        | Im $\gamma(\text{CH})$                                   | 803             | 808        | Im $\gamma(\text{ring})$    | 804           | 794        | Im $\gamma(\text{CH})$      |
| 665            | 658        | Im $\gamma(\text{ring})$                                 | 681             | 674        | Im $\gamma(\text{ring})$    |               |            |                             |
| 628            | 643        | Im $\gamma(\text{ring})$                                 | 623             | 626        | Im $\gamma(\text{ring})$    | 618           | 611        | Im $\gamma(\text{ring})$    |

**Assignments:** Am; amine, Im; imidazole ring,  $\nu$ ; stretching,  $\delta$ ; in-plane bending,  $\gamma$ ; out-of-plane bending,  $r$ ; rocking,  $t$ ; twisting,  $\omega$ ; wagging, skel; skeletal side-chain.

(a) H1 (*GG* and *GT* model)

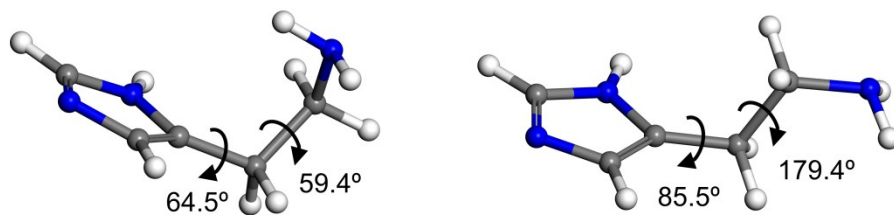

(b) H2 (*GG* and *GT* model)

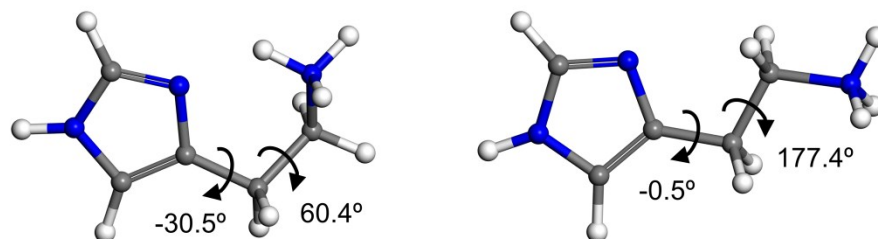

(c) H3 (*GT* and *TT* model)

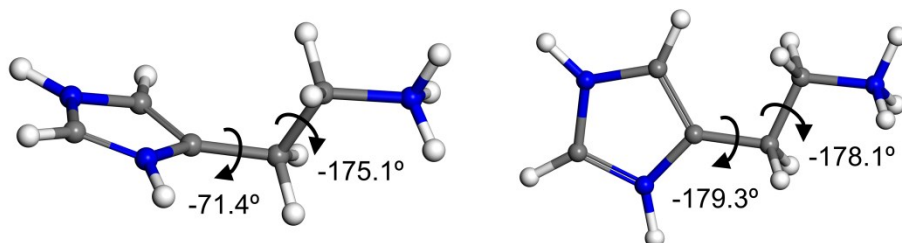

Fig. S1. Molecular conformations (*GG*, *GT* and *TT*) and the corresponding torsional angles ( $\tau_1$  and  $\tau_2$ ) predicted for (a) free base (H1), (b) monocation (H2), and (c) dication (H3) by the conformational analysis.

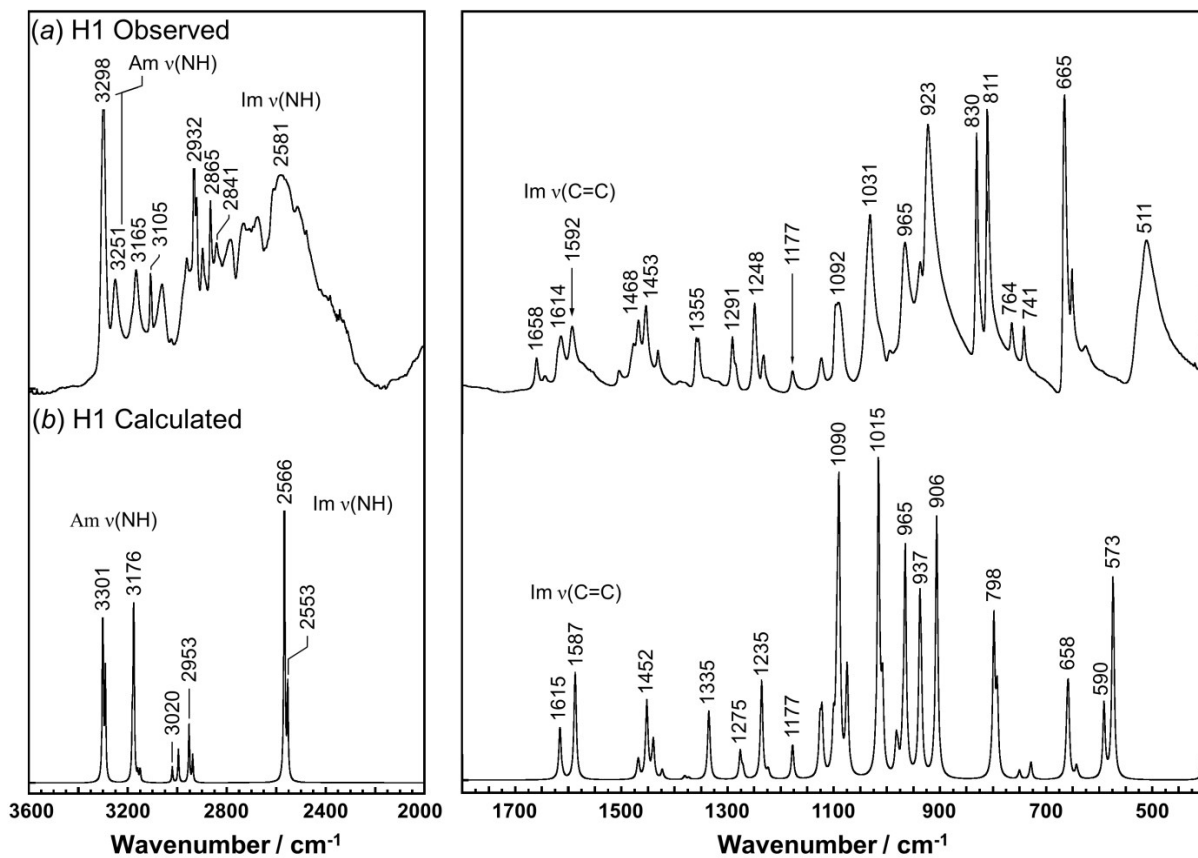

Fig. S2. Infrared spectra of histamine free base form (H1) : (a) the experimental data and (b) the calculated results.

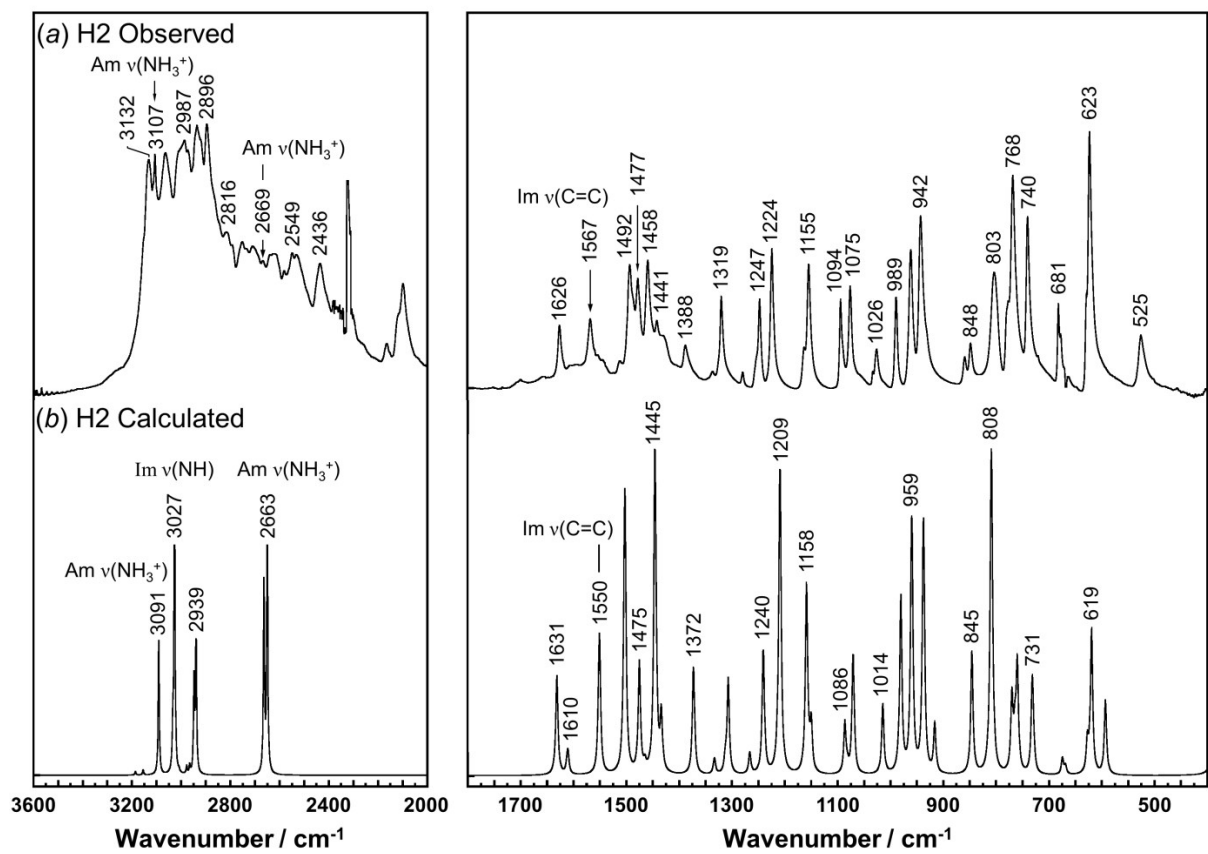

Fig. S3. Infrared spectra of histamine monocation form (H2): (a) the experimental data and (b) the calculated results.

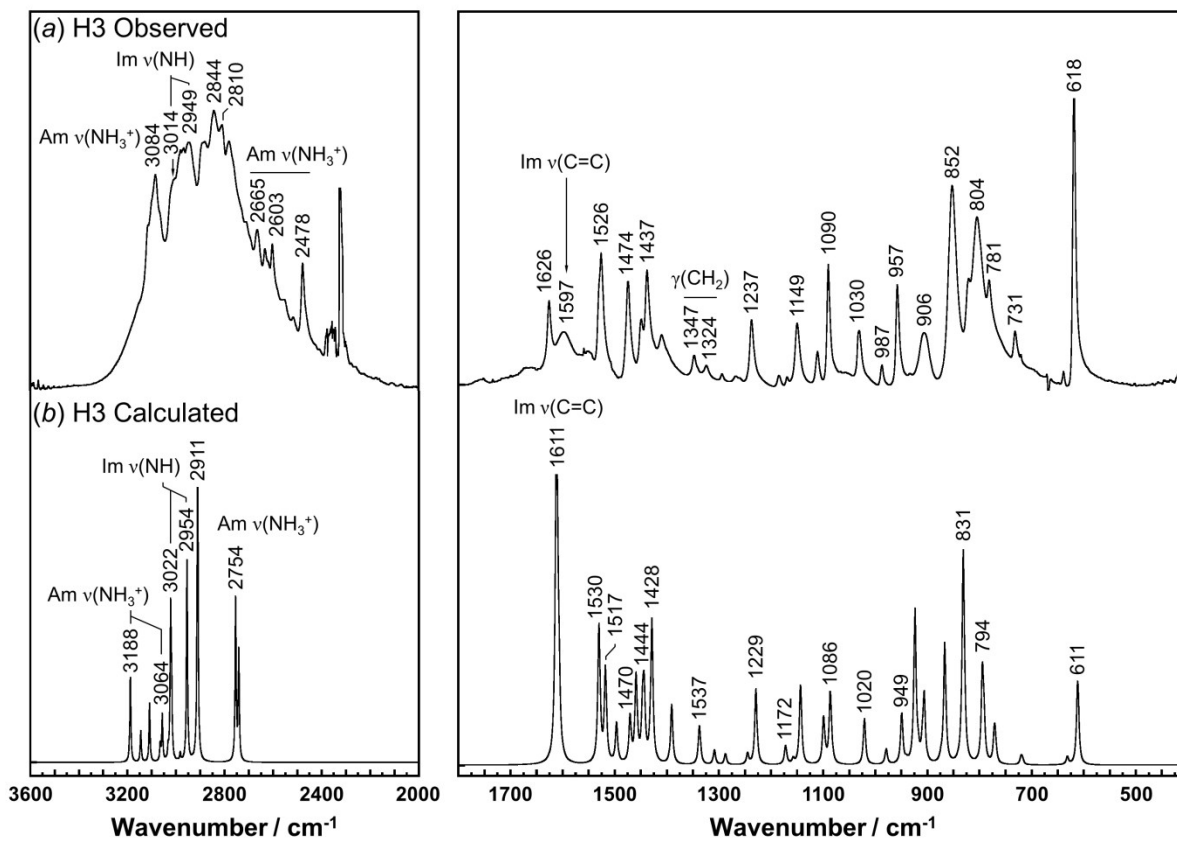

Fig. S4. Infrared spectra of histamine free base form (H3): (a) the experimental data and (b) the calculated results.

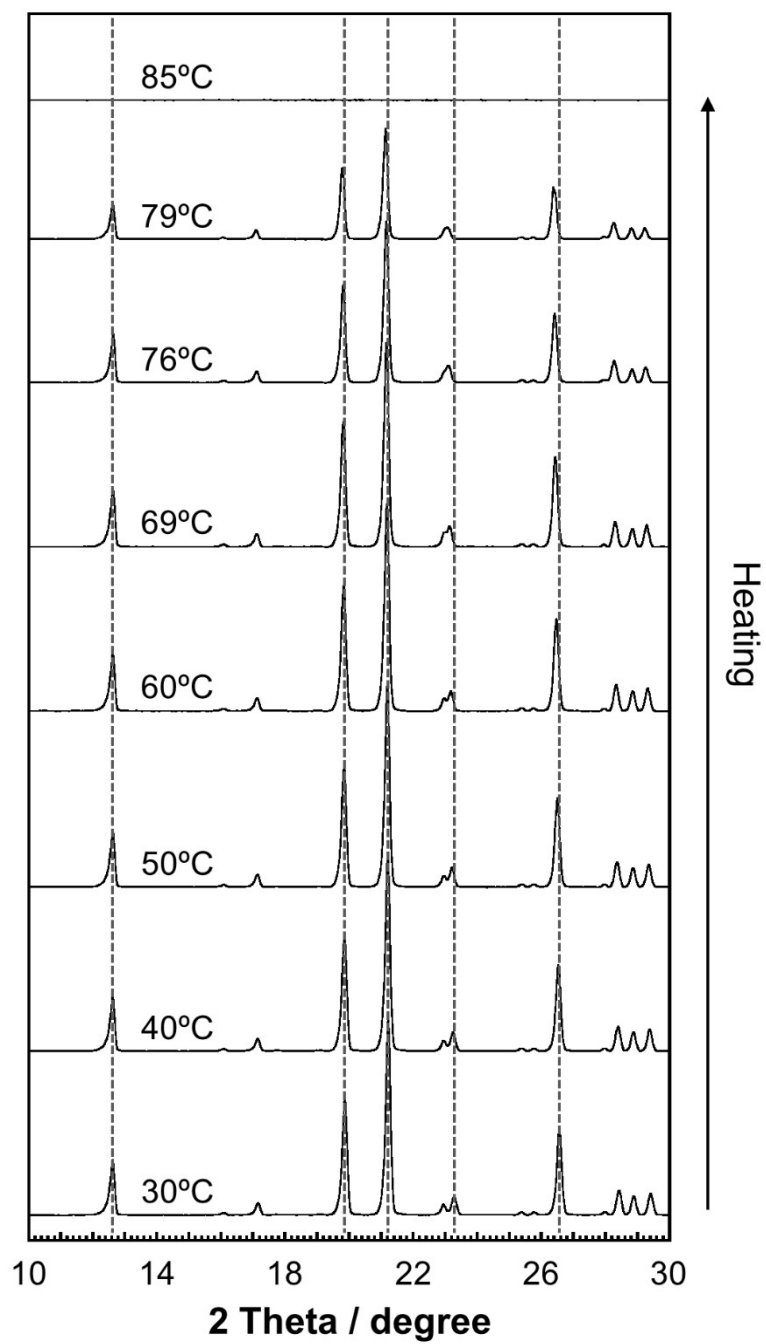

Fig. S5. X-ray diffraction profiles of histamine free base (H1) measured in the heating process. The X-ray wavelength is 1.5418 Å (Cu-K $\alpha$ ).

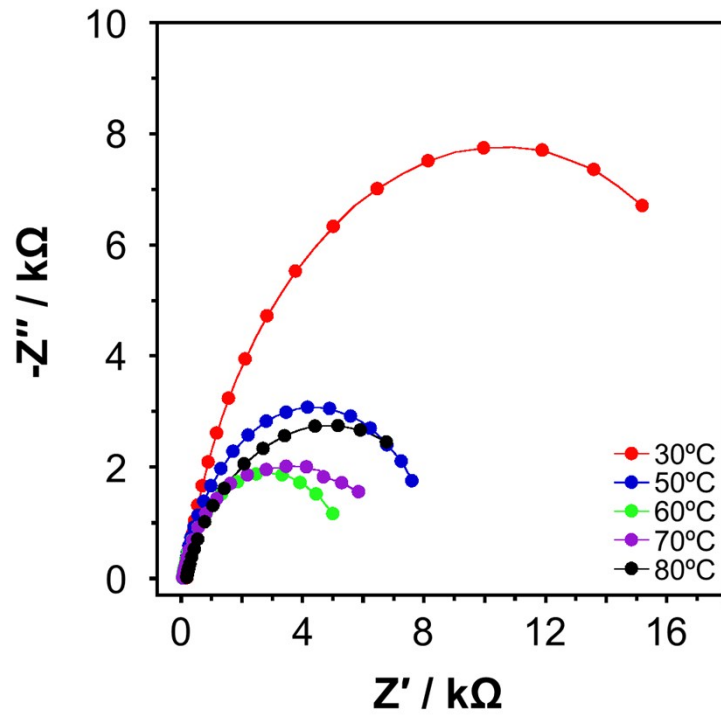

Fig. S6. Nyquist plot of histamine free base (H1) measured at the various temperature.
